# Supplementary material for: Kinetically controlled synthesis of Au102(SPh)44nanoclusters and catalytic application
Source: Royal Society of Chemistry journal article supplement (doi:10.1039/c5nr08338a), 2015-12-31
Supplement: c5nr08338a1.pdf [file c5nr08338a1.pdf]

## Supporting Information

### Kinetically Controlled Synthesis of $\text{Au}_{102}(\text{SPh})_{44}$ Nanoclusters and Catalytic Application

Yongdong Chen,<sup>a,b</sup> Jin Wang,<sup>a,b</sup> Chao Liu,<sup>b</sup> Zhimin Li,<sup>b</sup> and Gao Li<sup>\*b</sup>

<sup>a</sup> The Center of New Energy Materials and Technology, College of Chemistry and Chemical Engineering, Southwest Petroleum University, Chengdu 610500, China.

<sup>b</sup> Gold Catalysis Research Center, State Key Laboratory of Catalysis, Dalian Institute of Chemical Physics, Chinese Academy of Sciences, Dalian 116023, China. E-mail: gaoli@dicp.ac.cn

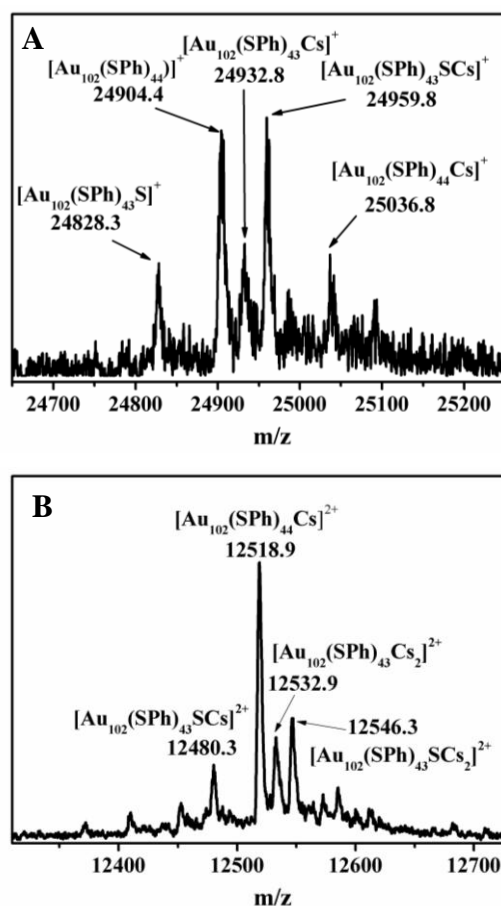

**Fig. S1.** ESI-MS spectra of the  $\text{Au}_{102}(\text{SPh})_{44}$  nanocluster.

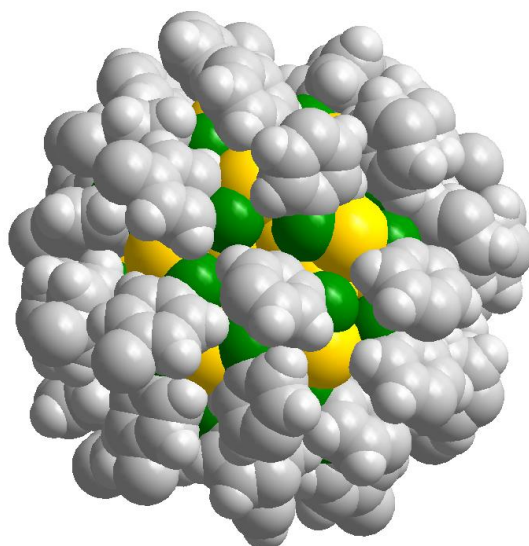

**Fig. S2.** The crystal structure of  $\text{Au}_{102}(\text{SR})_{44}$  nanoclusters, which was drawn in space-filling mode according to  $\text{Au}_{102}(\text{p-MBA})_{44}$ .<sup>1</sup> Color code: Au, yellow; S, green; C, grey; H, white.

**Table S1.** Recovery and Reuse of  $\text{Au}_{102}(\text{SPh})_{44}/\text{TiO}_2$  catalyst for the sulfoxidation. Reaction conditions: 0.1 mmol methyl phenyl sulfide, 0.1 mmol PhIO, 2 mL  $\text{CH}_2\text{Cl}_2$ , 0.5 mg  $\text{Au}_{102}(\text{SPh})_{44}$  supported on 100 mg  $\text{TiO}_2$ , 40 °C, 12 h.

| Entry | Cycle | Conversion (%) | Selectivity (%) |         |
|-------|-------|----------------|-----------------|---------|
|       |       |                | Sulfoxide       | Sulfone |
| 1     | 1st   | 90             | 98              | 2       |
| 2     | 2nd   | 91             | 98              | 2       |
| 3     | 3rd   | 88             | 99              | 1       |

## References

1. P. D. Jadzinsky, G. Calero, C. J. Ackerson, D. A. Bushnell and R. D. Kornberg, *Science*, 2007, **318**, 430.
